# Supplementary material
Source: publisher site journal article supplement (https://www.spandidos-publications.com/4786/downloadSupplementary)

Figure S1. Comparison of CFSE fluorescence in adherent and sphere cultures using flow cytometry. Representative dot plot at days 1, 3 and 5 after labeling. CFSE, carboxyfluorescein diacetate succinimidyl ester; SSC, side scatter.

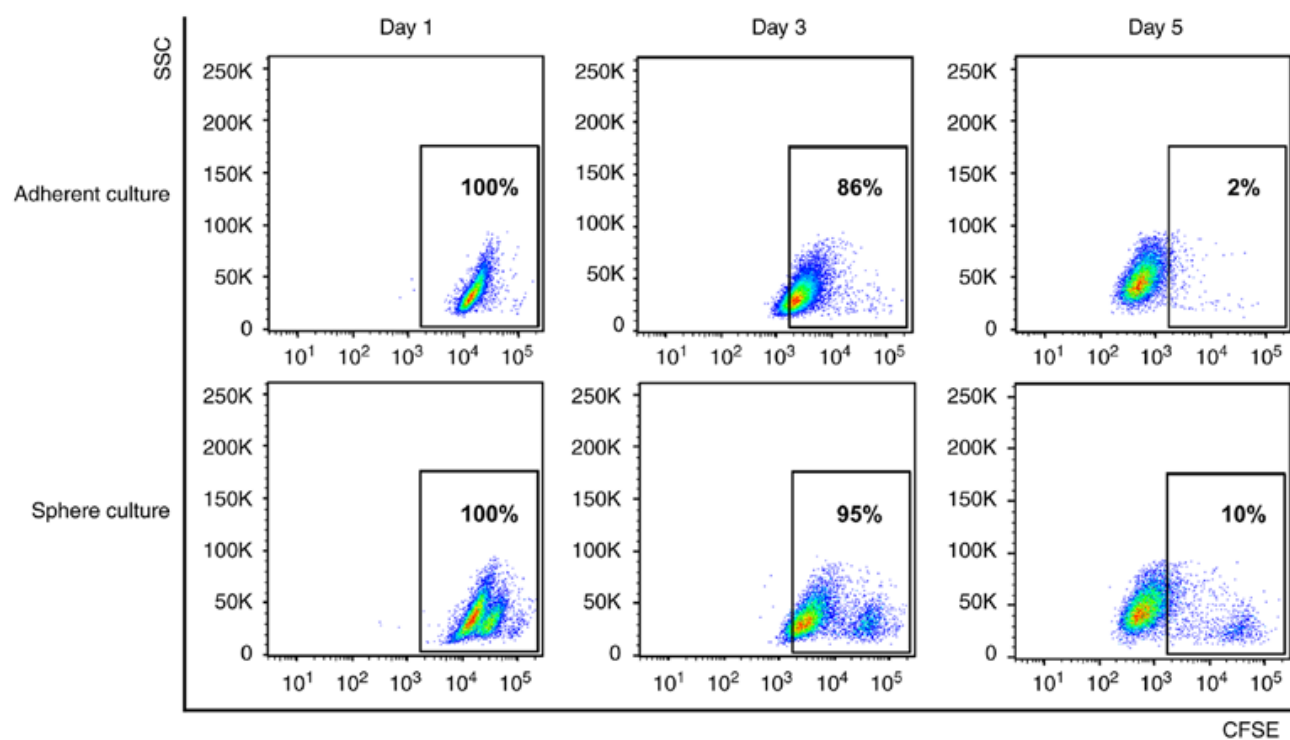

Figure S2. Cell cycle distribution of SCCs and non-SCCs in A673 and TC71 cell lines. (A) Representative cell cycle distributions of A673 and TC71 using flow cytometry after PI staining. The G0/G1 phase is shown in black, the S phase is shown in light gray, and the G2/M phase is shown in dark gray. (B) Comparative proportions of cells in each cell cycle phase among total cells, non-SCCs, and SCCs. The error bars indicate the standard error of the mean. \* $P < 0.05$ . CFSE, carboxyfluorescein diacetate succinimidyl ester; PI, propidium iodide; SCCs, slow-cycling cells.

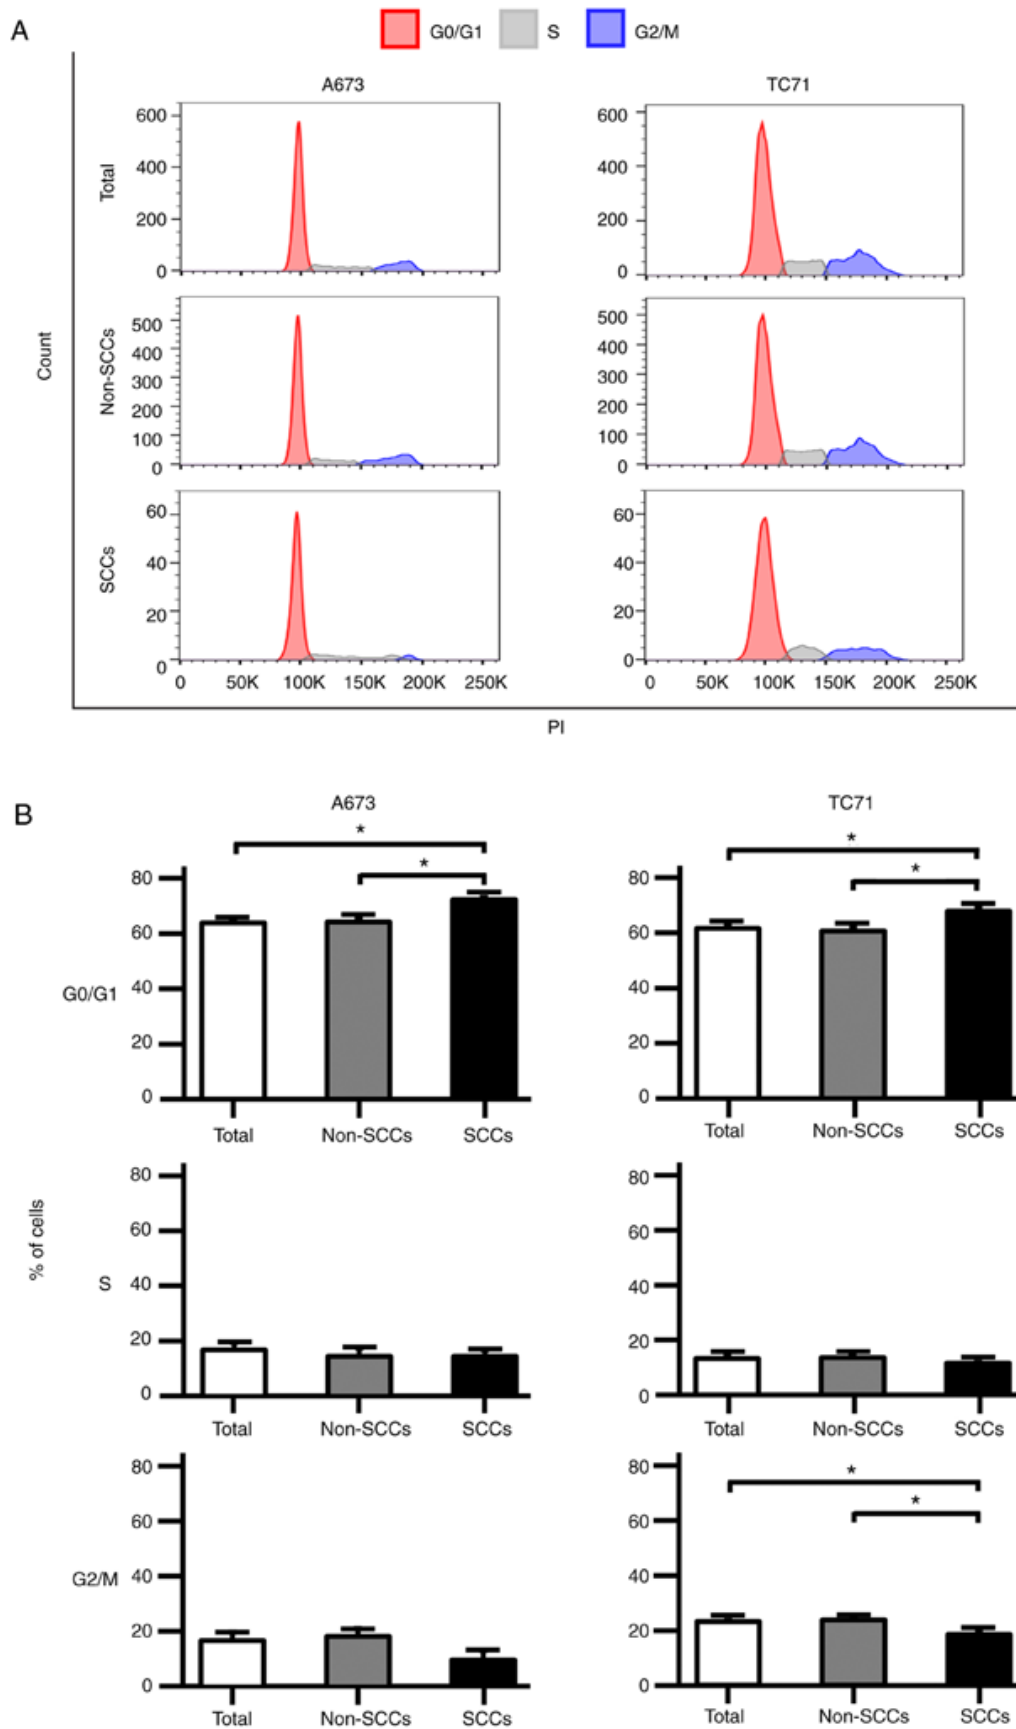

Supplement: Supplementary file 1 [file downloadSupplementary]
